# Supplementary material
Source: bioRxiv or medRxiv preprint supplement (https://www.medrxiv.org/highwire/filestream/85623/field_highwire_adjunct_files/0/2020.06.11.20128371-1.pdf)
Supplement: Supplementary file [file 2020.06.11.20128371-1.pdf]

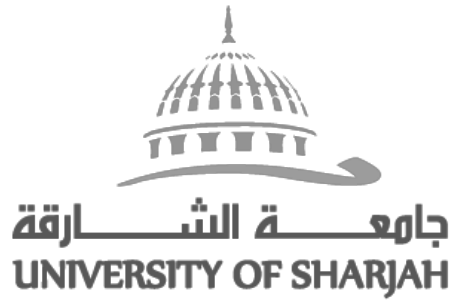

We are a group of researchers from universities across the UAE, and we are evaluating the levels of stress and anxiety associated with the recent corona virus also known as COVID-19 outbreak among parents and school teachers. The findings from this research will further improve our preparedness and awareness campaign as well as tailor interventions and services to the needs of the community

Kindly take a few minutes to answer the questions in the survey below, keeping in mind that all responses will remain confidential and you will not be identified in any way.

At the end of the survey, you can choose to provide (or not to provide) your email address for participation in a lucky draw for Apple AirPods.

Thanking you for your time and efforts. Your participation is highly valued.

For any further information or questions please feel free to contact Prof. Rabih Halwani at rhalwani@sharjah.ac.ae or Dr. Basema Saddik at bsaddik@sharjah.ac.ae.

For any ethical concerns please contact Dr. Suhail AlAmad at salamad@sharjah.ac.ae

**\* 1. Please indicate your willingness to participate in this survey**

- I am a parent, and I ACCEPT to participate in this survey
- I am a teacher, and I ACCEPT to participate in this survey
- I am neither a parent nor a teacher and I ACCEPT to participate in this survey
- I do NOT ACCEPT to participate in this survey

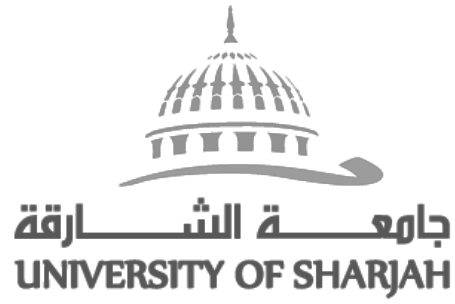

\* 2. What is your gender?

Female

Male

\* 3. What is your age in years?

\* 4. What is your educational level?

\* 5. Where are you located?

Inside the UAE

Outside the UAE (please specify)

6. Which emirate are you from?

\* 7. What is your employment status?

\* 8. What is your monthly family income (Dir-hams)?

\* 9. Do you have health/medical insurance?

- Yes
- No
- Other (please specify)

\* 10. What is your marital status?

\* 11. Do you have children?

- No (for questions 12-14 please select no children)
- Yes (How many?)

\* 12. What are the ages of your children? (Select all that apply)

- |                                                          |                                                        |
|----------------------------------------------------------|--------------------------------------------------------|
| <input type="checkbox"/> Infants/toddlers (1 to 3 years) | <input type="checkbox"/> Adolescents (13 to 18 years)  |
| <input type="checkbox"/> Preschoolers (3 to 5 years)     | <input type="checkbox"/> Young adults (19 to 21 years) |
| <input type="checkbox"/> School age (6 to 12 years)      | <input type="checkbox"/> No children                   |

\* 13. Which level of schooling are they at? (Select all that apply)

- |                                                 |                                           |
|-------------------------------------------------|-------------------------------------------|
| <input type="checkbox"/> No school/at home      | <input type="checkbox"/> Higher secondary |
| <input type="checkbox"/> Childcare              | <input type="checkbox"/> University       |
| <input type="checkbox"/> Primary                | <input type="checkbox"/> No children      |
| <input type="checkbox"/> Lower secondary        |                                           |
| <input type="checkbox"/> Other (please specify) |                                           |

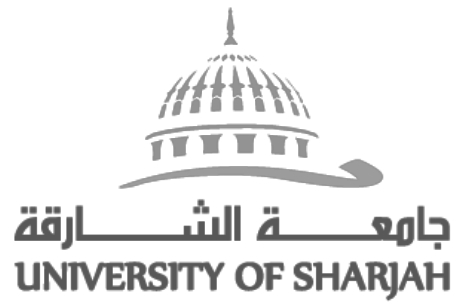

**The next few questions will assess your knowledge and beliefs about the recent COVID-19 outbreak**

\* 14. What do you think about each of the following statements about COVID-19?

|                                                            | True                  | False                 | Don't know            |
|------------------------------------------------------------|-----------------------|-----------------------|-----------------------|
| There is no specific treatment                             | <input type="radio"/> | <input type="radio"/> | <input type="radio"/> |
| I feel a sense of social responsibility by staying at home | <input type="radio"/> | <input type="radio"/> | <input type="radio"/> |

\* 15. What do you think of the following statements?

|                                                                         | Very likely           | Somewhat likely       | Not very likely       | Not likely at all     | Don't know            |
|-------------------------------------------------------------------------|-----------------------|-----------------------|-----------------------|-----------------------|-----------------------|
| There is likelihood of catching COVID-19 during the current outbreak    | <input type="radio"/> | <input type="radio"/> | <input type="radio"/> | <input type="radio"/> | <input type="radio"/> |
| There is likelihood of surviving COVID-19 if infected                   | <input type="radio"/> | <input type="radio"/> | <input type="radio"/> | <input type="radio"/> | <input type="radio"/> |
| There is a likelihood that I develop severe illness if I catch COVID-19 | <input type="radio"/> | <input type="radio"/> | <input type="radio"/> | <input type="radio"/> | <input type="radio"/> |

\* 16. Please describe how often you have personally followed the practices below since the recent COVID-19 outbreak

|                                                  | Always                | Most of the time      | Occasionally          | Never                 |
|--------------------------------------------------|-----------------------|-----------------------|-----------------------|-----------------------|
| Covering mouth when coughing or sneezing         | <input type="radio"/> | <input type="radio"/> | <input type="radio"/> | <input type="radio"/> |
| Using hand sanitizer more frequently             | <input type="radio"/> | <input type="radio"/> | <input type="radio"/> | <input type="radio"/> |
| Washing hands with soap                          | <input type="radio"/> | <input type="radio"/> | <input type="radio"/> | <input type="radio"/> |
| Wearing face mask                                | <input type="radio"/> | <input type="radio"/> | <input type="radio"/> | <input type="radio"/> |
| Avoiding crowded areas (e.g. malls)              | <input type="radio"/> | <input type="radio"/> | <input type="radio"/> | <input type="radio"/> |
| Avoiding public transport                        | <input type="radio"/> | <input type="radio"/> | <input type="radio"/> | <input type="radio"/> |
| Avoiding handshakes/personal contact with others | <input type="radio"/> | <input type="radio"/> | <input type="radio"/> | <input type="radio"/> |

**The next FEW questions will assess your levels of anxiety and worry in regards to the recent Corona outbreak. Please take your time considering your most suitable choices.**

\* 17. Since the COVID-19 outbreak, how often have you been bothered by the following problems?

|                                                   | Not at all            | Several days          | More than half the days | Nearly every day      |
|---------------------------------------------------|-----------------------|-----------------------|-------------------------|-----------------------|
| Feeling nervous, anxious or on edge               | <input type="radio"/> | <input type="radio"/> | <input type="radio"/>   | <input type="radio"/> |
| Not being able to stop or control worrying        | <input type="radio"/> | <input type="radio"/> | <input type="radio"/>   | <input type="radio"/> |
| Worrying too much about different things          | <input type="radio"/> | <input type="radio"/> | <input type="radio"/>   | <input type="radio"/> |
| Trouble relaxing                                  | <input type="radio"/> | <input type="radio"/> | <input type="radio"/>   | <input type="radio"/> |
| Being so restless that it is hard to sit still    | <input type="radio"/> | <input type="radio"/> | <input type="radio"/>   | <input type="radio"/> |
| Becoming easily annoyed or irritable              | <input type="radio"/> | <input type="radio"/> | <input type="radio"/>   | <input type="radio"/> |
| Feeling afraid as if something awful might happen | <input type="radio"/> | <input type="radio"/> | <input type="radio"/>   | <input type="radio"/> |

\* 18. If you checked off any problems above, how difficult have these problems made it for you to do your work, take care of things at home, or get along with other people?

| Not difficult at all  | Somewhat difficult    | Very difficult        | Extremely difficult   |
|-----------------------|-----------------------|-----------------------|-----------------------|
| <input type="radio"/> | <input type="radio"/> | <input type="radio"/> | <input type="radio"/> |

\* 19. I feel less anxious with the introduction of the following precautionary measures

|                                                                                   | Strongly agree        | Agree                 | Neither agree nor disagree | Disagree              | Strongly disagree     |
|-----------------------------------------------------------------------------------|-----------------------|-----------------------|----------------------------|-----------------------|-----------------------|
| Online learning at educational institutions                                       | <input type="radio"/> | <input type="radio"/> | <input type="radio"/>      | <input type="radio"/> | <input type="radio"/> |
| Airport screening                                                                 | <input type="radio"/> | <input type="radio"/> | <input type="radio"/>      | <input type="radio"/> | <input type="radio"/> |
| Travel bans                                                                       | <input type="radio"/> | <input type="radio"/> | <input type="radio"/>      | <input type="radio"/> | <input type="radio"/> |
| Availability of hand sanitizers in public places (e.g. malls, banks, restaurants) | <input type="radio"/> | <input type="radio"/> | <input type="radio"/>      | <input type="radio"/> | <input type="radio"/> |
| Cancellation of social events (e.g. sports, concerts, social gatherings)          | <input type="radio"/> | <input type="radio"/> | <input type="radio"/>      | <input type="radio"/> | <input type="radio"/> |
| Temporary closure of public places (e.g. gyms, museums, parks)                    | <input type="radio"/> | <input type="radio"/> | <input type="radio"/>      | <input type="radio"/> | <input type="radio"/> |
| Social isolation                                                                  | <input type="radio"/> | <input type="radio"/> | <input type="radio"/>      | <input type="radio"/> | <input type="radio"/> |

\* 20. What is your opinion about the following statements describing the public fear that is associated with the recent COVID-19 outbreak?

|                                                                                | Strongly agree        | Agree                 | Neither agree nor disagree | Disagree              | Strongly disagree     |
|--------------------------------------------------------------------------------|-----------------------|-----------------------|----------------------------|-----------------------|-----------------------|
| The public fear is justifiable/ appropriate                                    | <input type="radio"/> | <input type="radio"/> | <input type="radio"/>      | <input type="radio"/> | <input type="radio"/> |
| The fear is dysfunctional (has caused unnecessary absence from school or work) | <input type="radio"/> | <input type="radio"/> | <input type="radio"/>      | <input type="radio"/> | <input type="radio"/> |

\* 21. How worried have you felt over the past few weeks about the following?

|                                                                                         | Extremely worried     | Very worried          | Somewhat worried      | Little worried        | Not worried at all    | N/A                   |
|-----------------------------------------------------------------------------------------|-----------------------|-----------------------|-----------------------|-----------------------|-----------------------|-----------------------|
| I am worried about catching COVID-19 myself                                             | <input type="radio"/> | <input type="radio"/> | <input type="radio"/> | <input type="radio"/> | <input type="radio"/> | <input type="radio"/> |
| I am worried about one of my parents catching COVID-19                                  | <input type="radio"/> | <input type="radio"/> | <input type="radio"/> | <input type="radio"/> | <input type="radio"/> | <input type="radio"/> |
| I am worried about one of my children catching COVID-19                                 | <input type="radio"/> | <input type="radio"/> | <input type="radio"/> | <input type="radio"/> | <input type="radio"/> | <input type="radio"/> |
| I am worried about what COVID-19 can do to me health-wise                               | <input type="radio"/> | <input type="radio"/> | <input type="radio"/> | <input type="radio"/> | <input type="radio"/> | <input type="radio"/> |
| I am worried about social isolation/quarantine                                          | <input type="radio"/> | <input type="radio"/> | <input type="radio"/> | <input type="radio"/> | <input type="radio"/> | <input type="radio"/> |
| I am worried about the loss of income if infected with COVID-19                         | <input type="radio"/> | <input type="radio"/> | <input type="radio"/> | <input type="radio"/> | <input type="radio"/> | <input type="radio"/> |
| I am worried about transmitting COVID-19 from my workplace to my family members/friends | <input type="radio"/> | <input type="radio"/> | <input type="radio"/> | <input type="radio"/> | <input type="radio"/> | <input type="radio"/> |

\* 22. For the next question, it would help us if you answered all items as best you can even if you are not absolutely certain.

Since the COVID-19 outbreak, I have noticed the following changes in my child/ren's behavior.

|                                                              | Not true              | Somewhat true         | Certainly true        | N/A                   |
|--------------------------------------------------------------|-----------------------|-----------------------|-----------------------|-----------------------|
| Often complains of headaches, stomach aches or sickness      | <input type="radio"/> | <input type="radio"/> | <input type="radio"/> | <input type="radio"/> |
| Has many worries, often seems worried                        | <input type="radio"/> | <input type="radio"/> | <input type="radio"/> | <input type="radio"/> |
| Often unhappy, down-hearted or tearful                       | <input type="radio"/> | <input type="radio"/> | <input type="radio"/> | <input type="radio"/> |
| Nervous or clingy in new situations, easily loses confidence | <input type="radio"/> | <input type="radio"/> | <input type="radio"/> | <input type="radio"/> |
| Has many fears, easily scared                                | <input type="radio"/> | <input type="radio"/> | <input type="radio"/> | <input type="radio"/> |



\* 23. If you answered "somewhat true" or "certainly true" to any of the previous questions, how many of your children displayed these behaviours?

\* 24. Which of the following practices have you undertaken to help reduce anxiety in your children/family during the COVID-19 outbreak?

|                                                                                             | Always                | Most of the time      | Occasionally          | Never                 | N/A                   |
|---------------------------------------------------------------------------------------------|-----------------------|-----------------------|-----------------------|-----------------------|-----------------------|
| I have openly discussed the COVID-19 with my children/family                                | <input type="radio"/> | <input type="radio"/> | <input type="radio"/> | <input type="radio"/> | <input type="radio"/> |
| I have educated my child/ren about proper protective measures (e.g. hand hygiene)           | <input type="radio"/> | <input type="radio"/> | <input type="radio"/> | <input type="radio"/> | <input type="radio"/> |
| I have reassured my child/ren that they are safe                                            | <input type="radio"/> | <input type="radio"/> | <input type="radio"/> | <input type="radio"/> | <input type="radio"/> |
| I have limited my child/ren's exposure to news coverage of COVID-19, including social media | <input type="radio"/> | <input type="radio"/> | <input type="radio"/> | <input type="radio"/> | <input type="radio"/> |
| I have created a schedule for learning and fun activities                                   | <input type="radio"/> | <input type="radio"/> | <input type="radio"/> | <input type="radio"/> | <input type="radio"/> |
| I have tried to maintain a regular routine at home (e.g. dinner, bedtime)                   | <input type="radio"/> | <input type="radio"/> | <input type="radio"/> | <input type="radio"/> | <input type="radio"/> |

\* 25. If a vaccine is developed for COVID-19 in the near future, how likely are you:

|                               | Very likely           | Somewhat likely       | Not very likely       | Not likely at all     | I don't know          | N/A                   |
|-------------------------------|-----------------------|-----------------------|-----------------------|-----------------------|-----------------------|-----------------------|
| To take the vaccine yourself? | <input type="radio"/> | <input type="radio"/> | <input type="radio"/> | <input type="radio"/> | <input type="radio"/> | <input type="radio"/> |
| To vaccinate your children?   | <input type="radio"/> | <input type="radio"/> | <input type="radio"/> | <input type="radio"/> | <input type="radio"/> | <input type="radio"/> |

\* 26. Do you suffer from any of the following pre-existing medical conditions? (Select all that apply)

- |                                                 |                                               |
|-------------------------------------------------|-----------------------------------------------|
| <input type="checkbox"/> Diabetes Mellitus      | <input type="checkbox"/> Asthma               |
| <input type="checkbox"/> Heart problems         | <input type="checkbox"/> Respiratory problems |
| <input type="checkbox"/> High blood pressure    | <input type="checkbox"/> Cancer               |
| <input type="checkbox"/> Dyslipidemia           | <input type="checkbox"/> None of the above    |
| <input type="checkbox"/> Other (please specify) |                                               |

\* 27. Have you or your family members experienced any of the following symptoms over the last 2 weeks? (Select all that apply)

- |                                                 |                                            |
|-------------------------------------------------|--------------------------------------------|
| <input type="checkbox"/> Headaches              | <input type="checkbox"/> Myalgia           |
| <input type="checkbox"/> Fever                  | <input type="checkbox"/> Dizziness         |
| <input type="checkbox"/> Cough                  | <input type="checkbox"/> Runny nose        |
| <input type="checkbox"/> Difficulty breathing   | <input type="checkbox"/> Diarrhea          |
| <input type="checkbox"/> Sore throat            | <input type="checkbox"/> None of the above |
| <input type="checkbox"/> Other (please specify) |                                            |

\* 28. What measures have you taken over the last few weeks for any flu like symptoms? (Select all that apply)

Vitamin C

Oral Steroids (e.g. Corticosteroids, cortisone, prednisone)

Flu medications (e.g. Tamiflu)

Herbal remedies

Anti-inflammatory drugs (e.g. Aspirin, Ibuprofen (Advil, Nurofen))

No measures taken

Analgesics and anti-pyretics (e.g. Paracetamol, Tylenol, Panadol)

Other (please specify)

\* 29. My child/ren are up to date with their vaccinations

Yes

No

Not applicable

\* 30. Do you smoke?

Yes

No

I used to smoke but I have now quit smoking

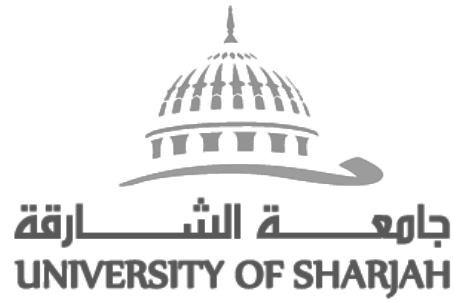

\* 31. What do you smoke? (Select all that apply)

- Cigarettes
- Shisha
- Midwakh
- Vaping
- Other (please specify)

\* 32. Have your smoking habits changed since the COVID-19 outbreak?

- No
- Yes (please specify what changes you have made)

33.

**Thank you for completing this survey. We appreciate your time and efforts. If you would like to participate in a lucky draw for Apple AirPods, please provide your email address below.**
